# Supplementary material
Source: PubMed Central journal article supplement (PMC6050714)
Supplement: mmc1.pdf [file mmc1.pdf]

**Biophysical Journal, Volume 115**

**Supplemental Information**

**Super-Resolution Imaging Reveals TCTN2 Depletion-Induced IFT88 Lu-  
men Leakage and Ciliary Weakening**

**Rueyhung Roc Weng, T. Tony Yang, Chia-En Huang, Chih-Wei Chang, Won-Jing Wang, and Jung-Chi Liao**

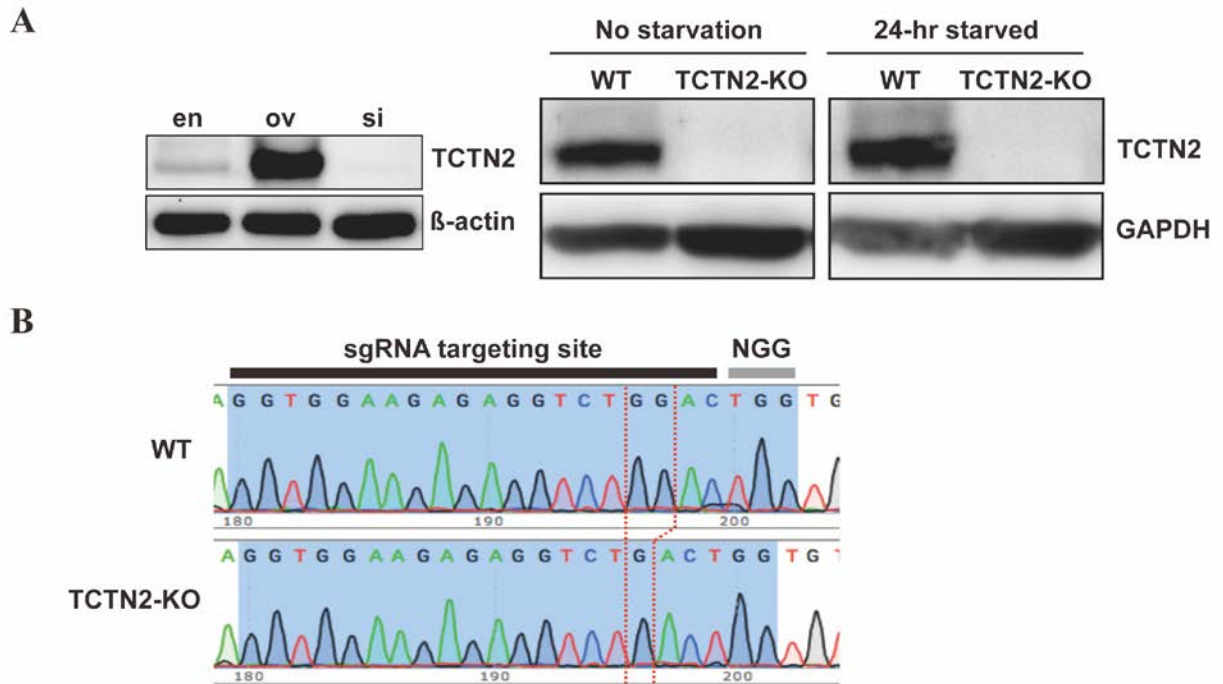

**Figure S1.** Validation of overexpression and depletion of TCTN2. (A) Immunoblotting of cells expressing endogenous (en), overexpressed (ov) and siRNA knockdown (si) of TCTN2 confirmed the effectiveness of antibody specificity, plasmid for overexpression and siRNA knockdown. CRISPR/Cas9 knockout (KO) efficiency is also verified. (B) A sequencing result showing loss of a guanine at the sgRNA targeting site of *TCTN2*<sup>-/-</sup> RPE1 cells.

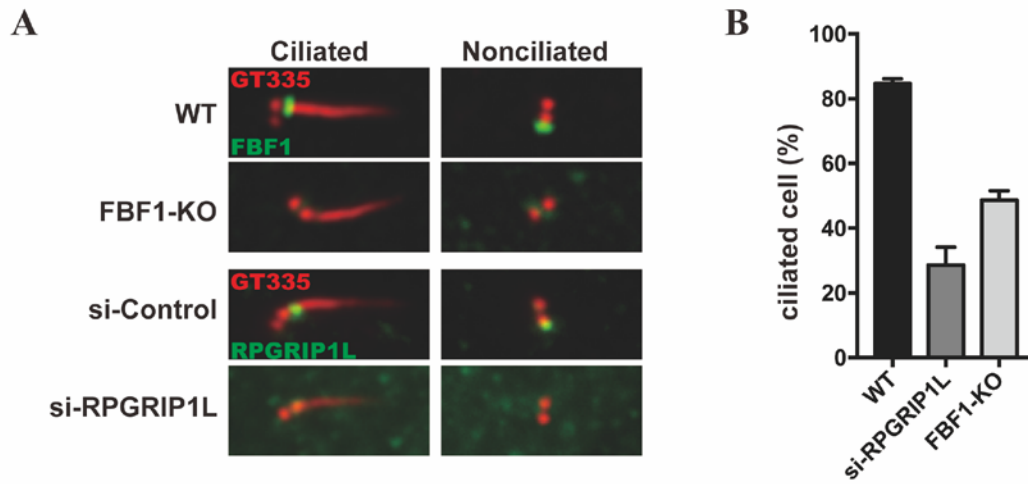

**Figure S2.** Validation of RPGRIP1L knockdown and FBF1 knockout efficiencies. (A) Immunostained images confirming the effectiveness of *RPGRIP1L* siRNA knockdown and *FBF1* CRISPR/Cas9 knockout. (B) Reduction of ciliation frequency by RPGRIP1L knockdown and FBF1 knockout.
